# Supplementary material for: Antitrypanosomal Activity of Sesquiterpene Lactones from Helianthus tuberosus L. Including a New Furanoheliangolide with an Unusual Structure
Source: PubMed Central journal article supplement (PMC6471283; doi:10.3390/molecules24061068), 2019-03-18
Supplement: molecules-24-01068-s001.pdf [file molecules-24-01068-s001.pdf]

Supplementary material

# Antitrypanosomal Activity of Sesquiterpene Lactones from *Helianthus tuberosus* L. Including a New Furanoheliangolide with an Unusual Structure

Anna Galkina <sup>1</sup>, Nico Krause <sup>1</sup>, Mairin Lenz <sup>1</sup>, Constantin G. Daniliuc <sup>2</sup>, Marcel Kaiser <sup>3,4</sup> and Thomas J. Schmidt <sup>1,\*</sup>

<sup>1</sup> Institute of Pharmaceutical Biology and Phytochemistry (IPBP), University of Münster, PharmaCampus – Corrensstrasse 48, D-48149 Münster, Germany; no4k-a@yandex.ru (A.G.); Nico1Krause@gmx.de (N.K.); mailen@uni-muenster.de (M.L.)

<sup>2</sup> Institute of Organic Chemistry, University of Münster, Corrensstraße 40, D-48149 Münster, Germany; constantin.daniliuc@uni-muenster.de

<sup>3</sup> Swiss Tropical and Public Health Institute (Swiss TPH), Socinstrasse 57, Basel CH-4051, Switzerland

<sup>4</sup> University of Basel, Petersplatz 1, Basel CH-4003, Switzerland; Email: marcel.kaiser@unibas.ch

\* Correspondence: thomschm@uni-muenster.de; Tel.: +49-251-83-33378

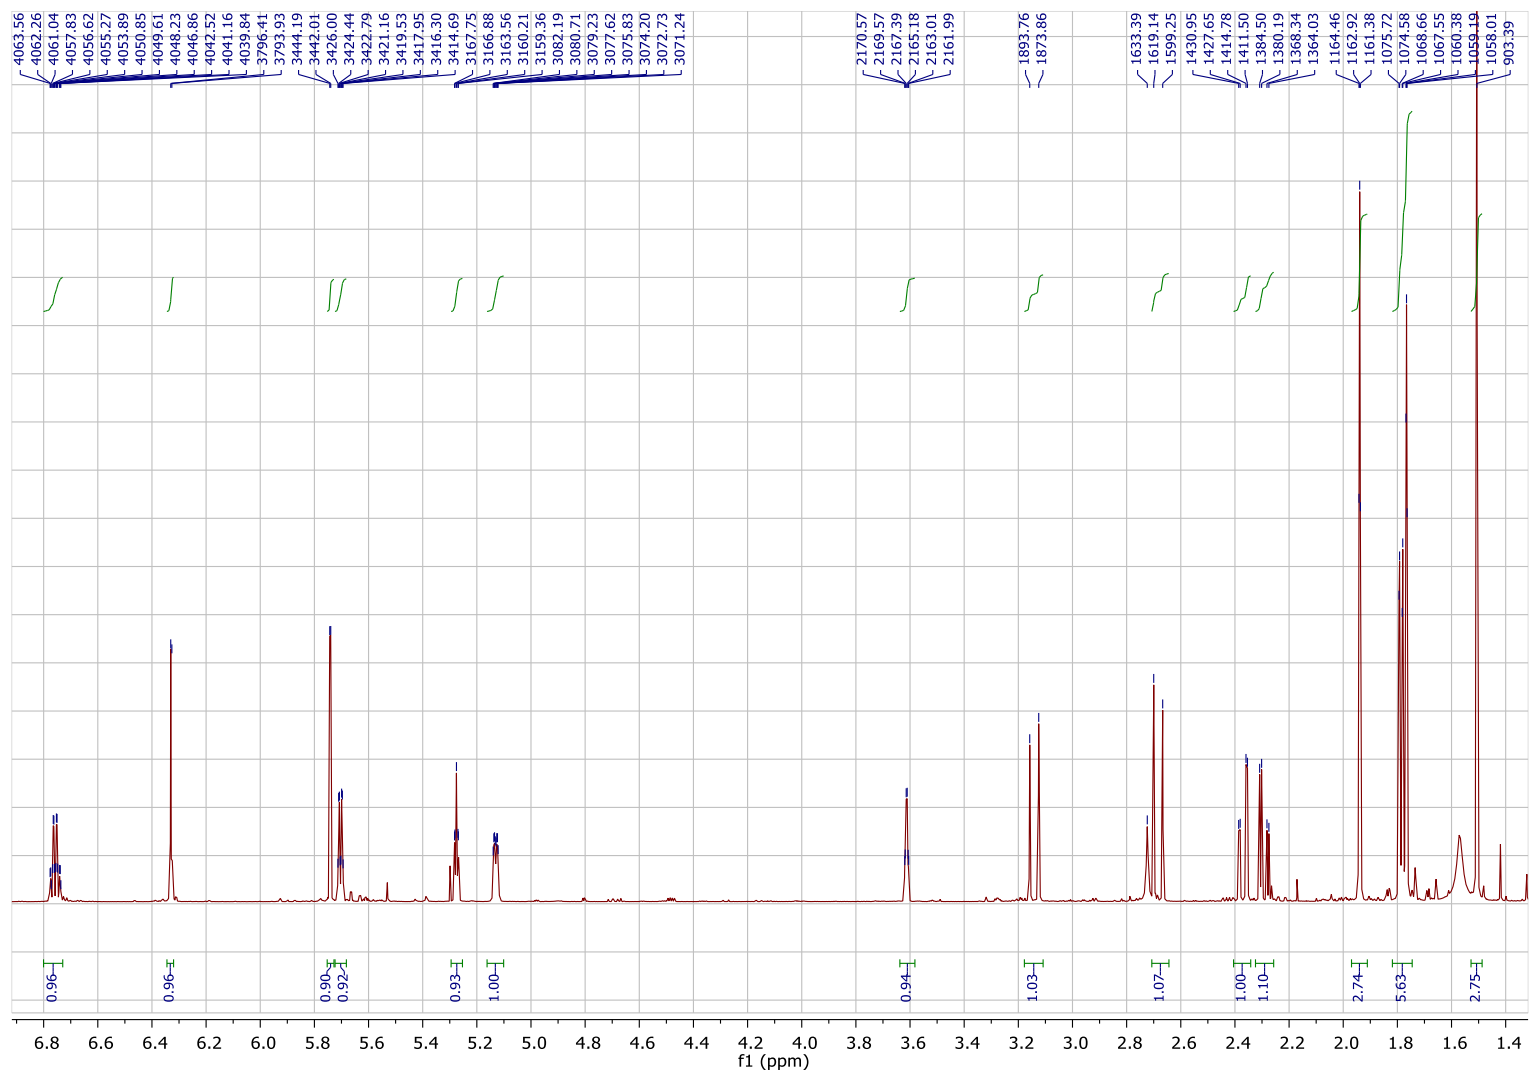

Figure 1. <sup>1</sup>H-NMR spectrum of compound 4 (600 MHz, CDCl<sub>3</sub>).

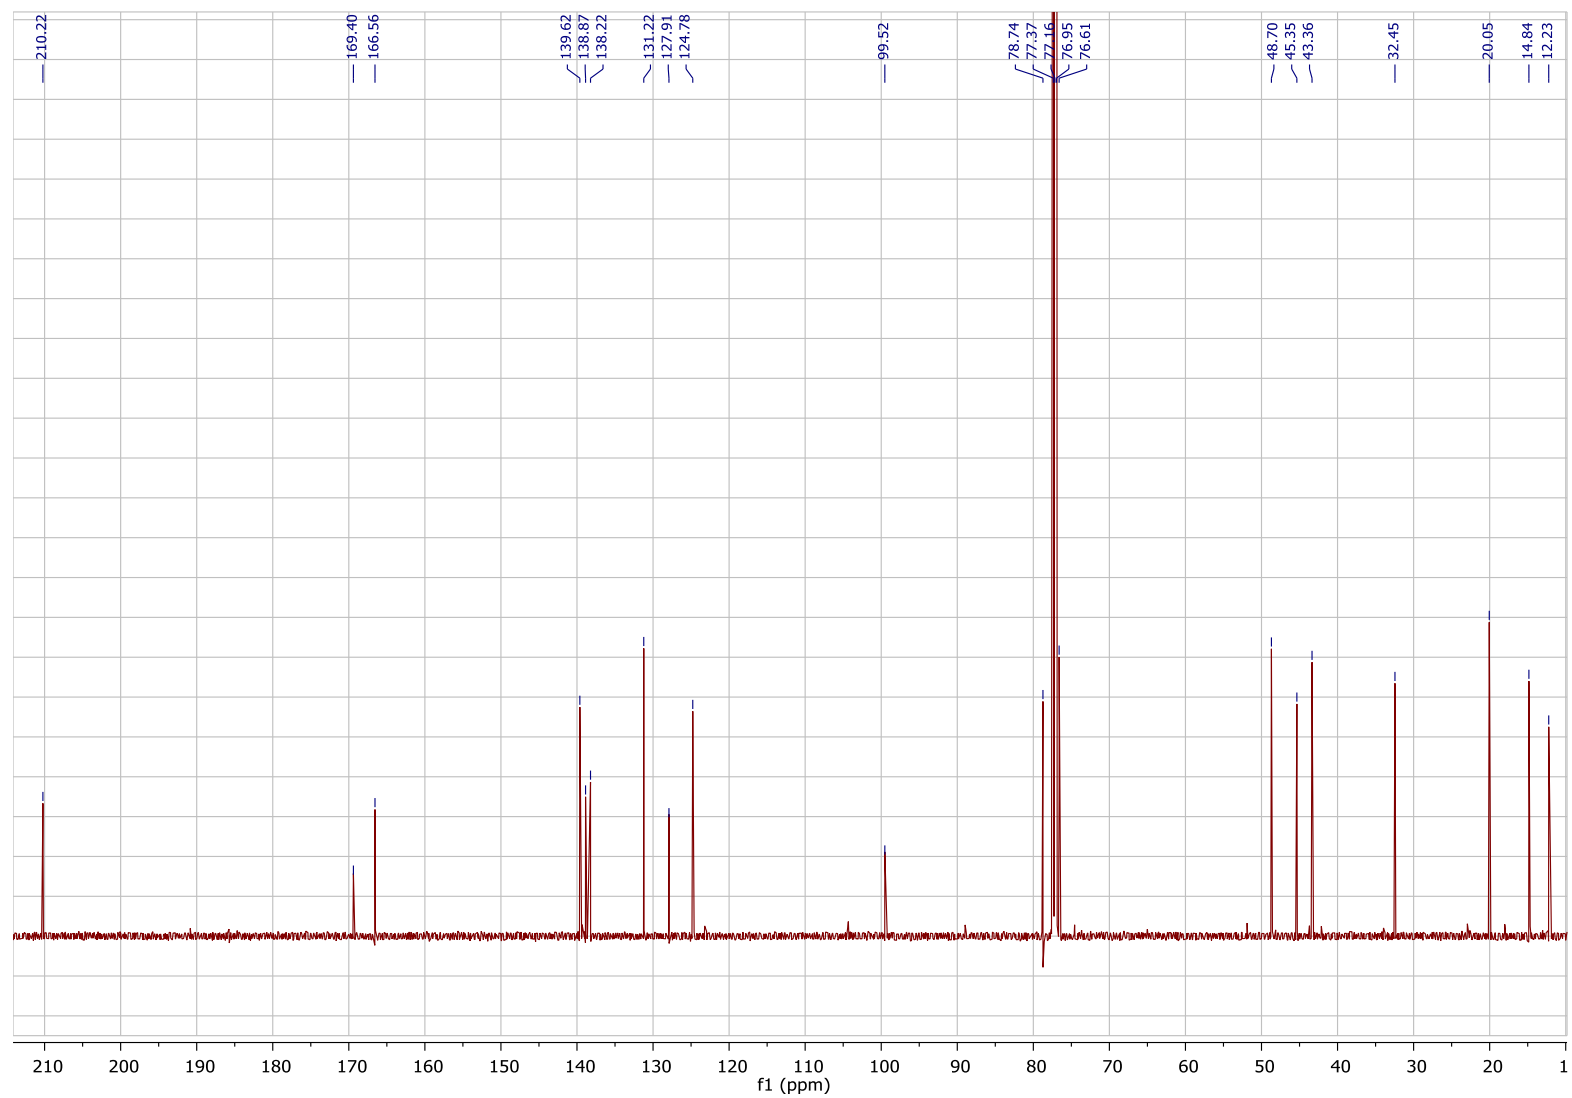

Figure 2.  $^{13}\text{C}$ -NMR spectrum of compound 4 (150 MHz,  $\text{CDCl}_3$ ).

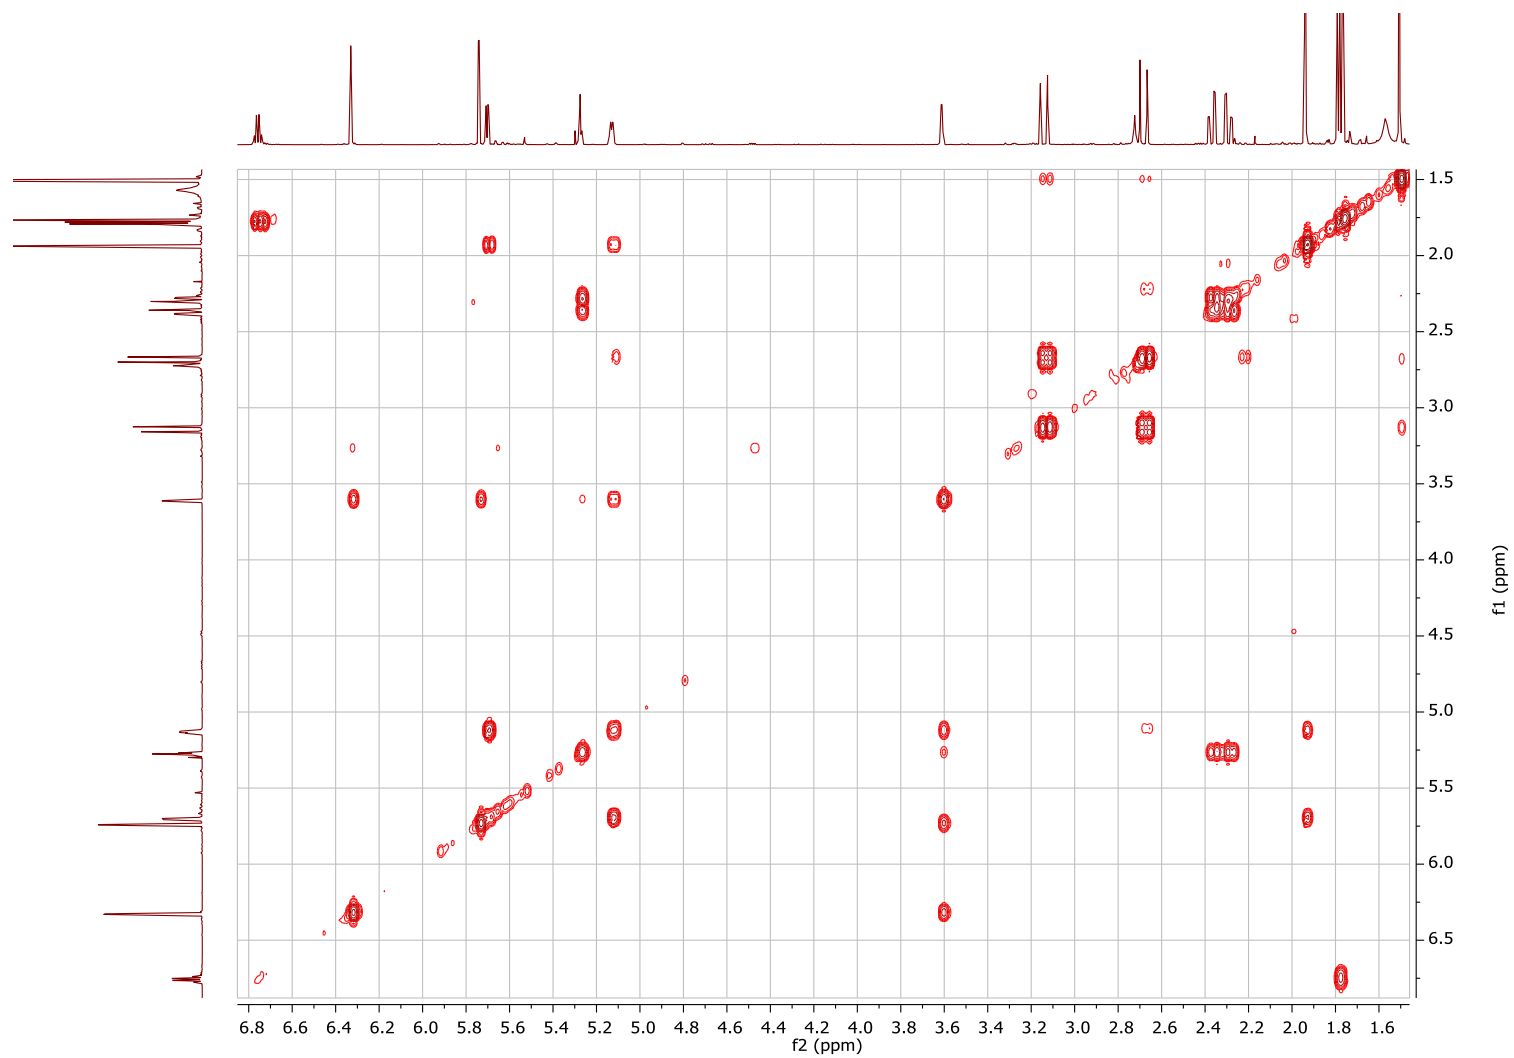

**Figure 3.**  $^1\text{H}/^1\text{H}$ -COSY spectrum of compound 4 (600 MHz,  $\text{CDCl}_3$ ).

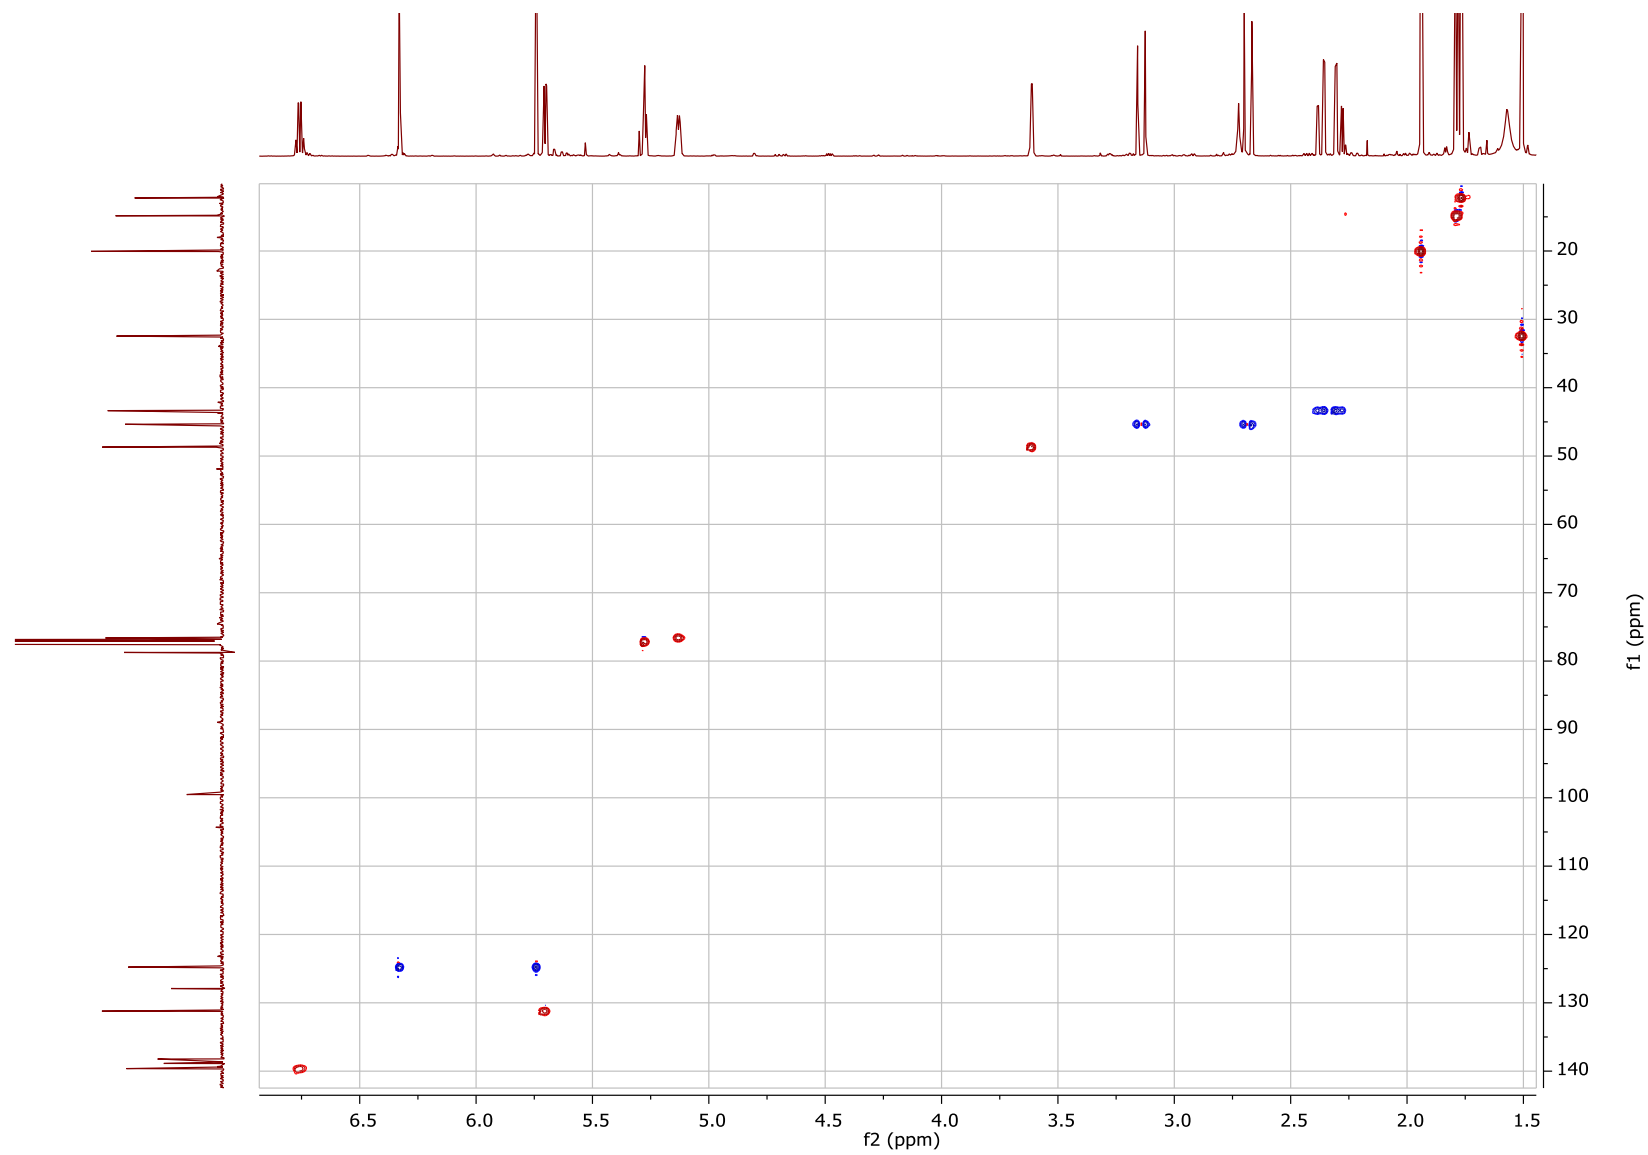

Figure S4.  $^1\text{H}/^{13}\text{C}$ -HSQC spectrum of compound 4 (600 MHz,  $\text{CDCl}_3$ )

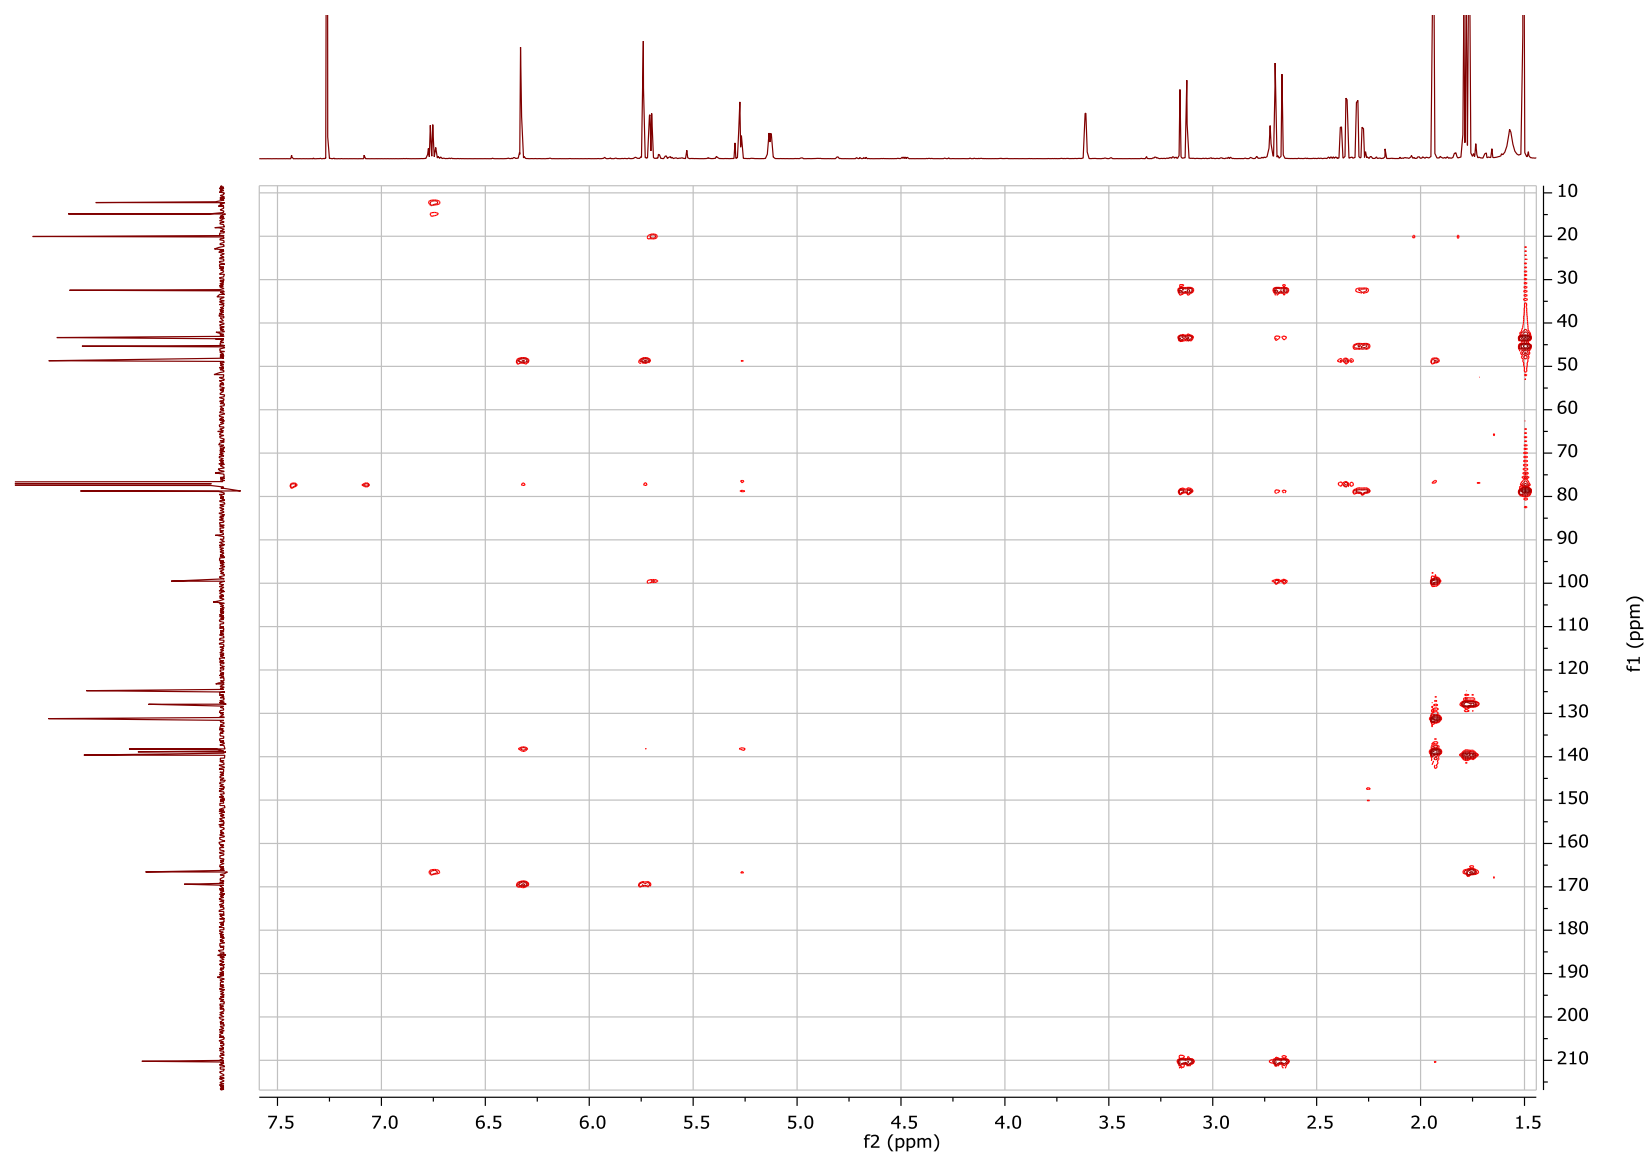

Figure S5.  $^1\text{H}/^{13}\text{C}$ -HMBC spectrum of compound 4 (600 MHz,  $\text{CDCl}_3$ )

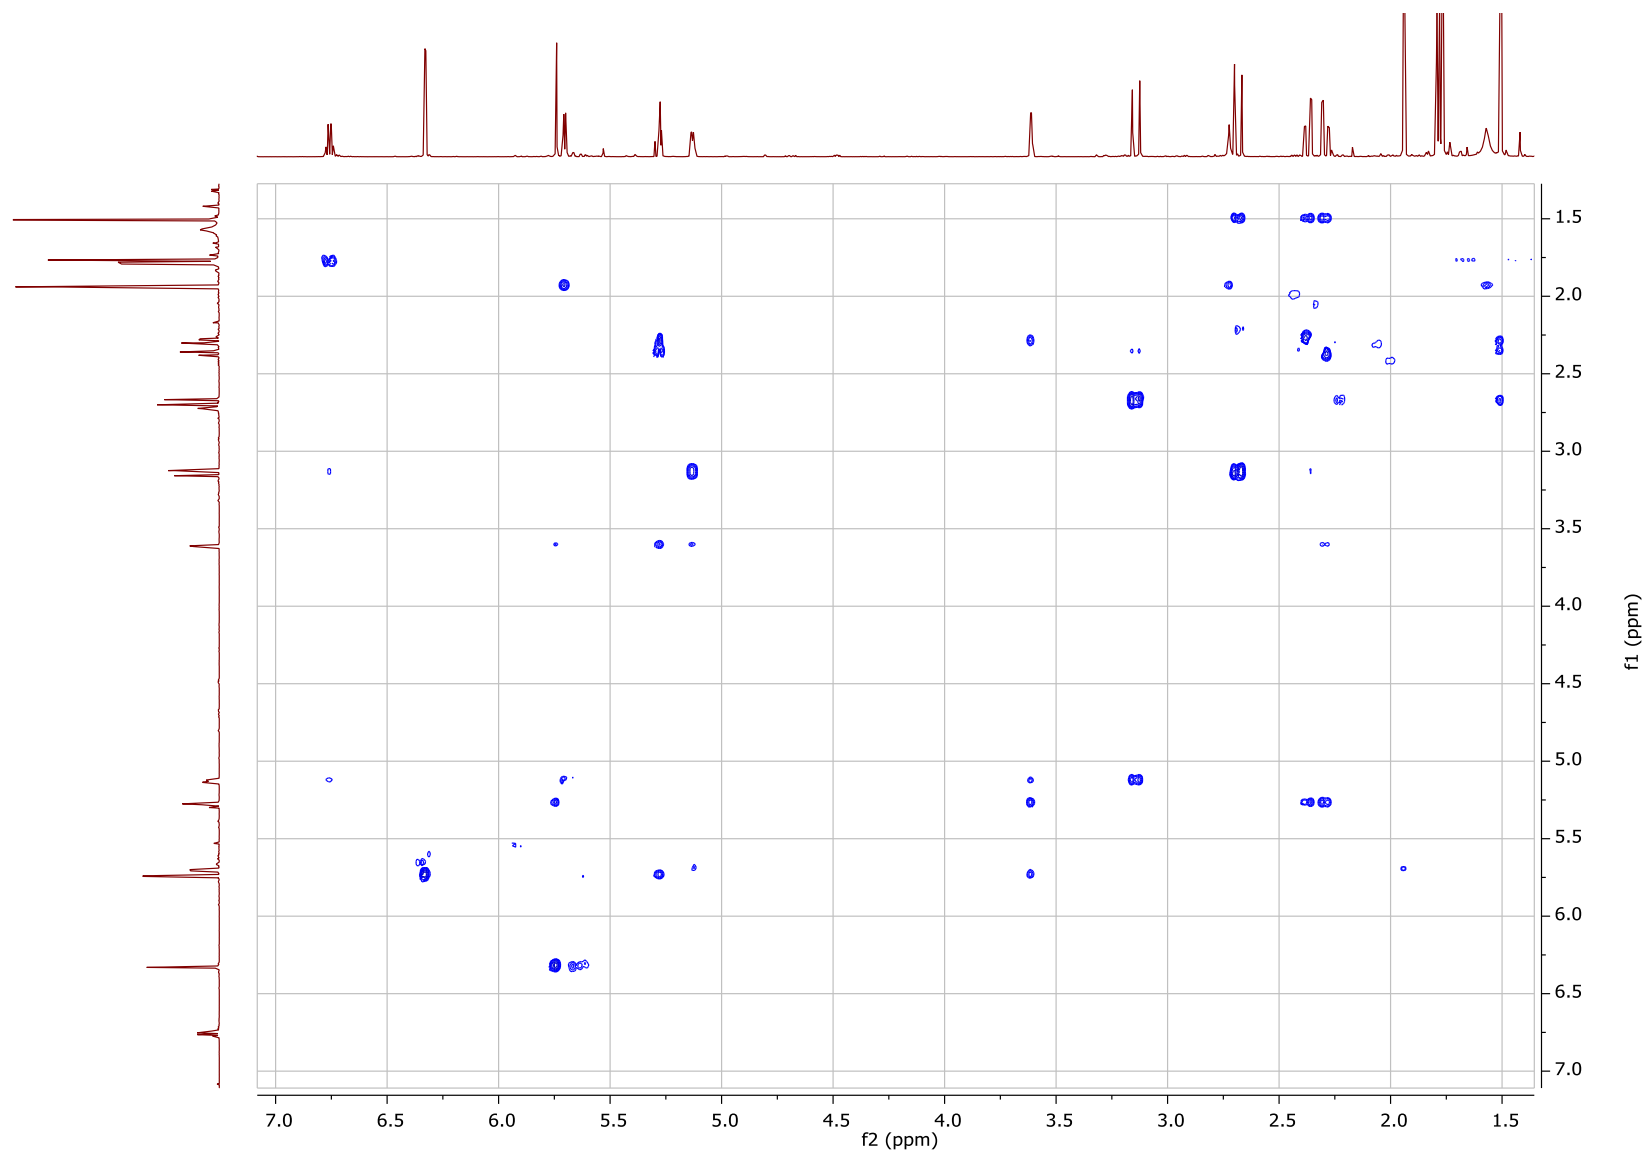

**Figure S6.**  $^1\text{H}/^1\text{H}$ -NOESY spectrum of compound 4 (600 MHz,  $\text{CDCl}_3$ )

**Table S1.** Data Collection details for dan9339 (compound 4).

| Axis  | dx/mm  | 2 $\theta$ / $^{\circ}$ | $\omega$ / $^{\circ}$ | $\phi$ / $^{\circ}$ | $\chi$ / $^{\circ}$ | Width<br>h/ $^{\circ}$ | Fra-<br>mes | Time/s | Wave-<br>length/ $\text{\AA}$ | Voltage/kV | Current/mA | Tempera-<br>ture/K |
|-------|--------|-------------------------|-----------------------|---------------------|---------------------|------------------------|-------------|--------|-------------------------------|------------|------------|--------------------|
| Omega | 33.971 | 104.27                  | -3.89                 | 135.00              | 62.19               | 1.10                   | 99          | 55.00  | 1.54184                       | 50         | 1.0        | 115                |
| Omega | 33.971 | 104.27                  | 108.73                | 45.00               | -44.94              | 1.10                   | 85          | 55.00  | 1.54184                       | 50         | 1.0        | 115                |
| Omega | 33.971 | -2.53                   | -100.40               | 90.00               | 44.94               | 1.10                   | 85          | 20.00  | 1.54184                       | 50         | 1.0        | 115                |
| Phi   | 33.971 | 104.27                  | 105.54                | -163.75             | -23.00              | 1.10                   | 225         | 40.00  | 1.54184                       | 50         | 1.0        | 115                |
| Phi   | 33.971 | 104.27                  | 14.94                 | -163.65             | 23.00               | 1.10                   | 203         | 55.00  | 1.54184                       | 50         | 1.0        | 115                |
| Omega | 33.971 | 104.27                  | 108.73                | 90.00               | -44.94              | 1.10                   | 85          | 55.00  | 1.54184                       | 50         | 1.0        | 115                |
| Phi   | 33.971 | -59.27                  | 40.27                 | 0.15                | -44.44              | 1.10                   | 327         | 40.00  | 1.54184                       | 50         | 1.0        | 115                |
| Phi   | 33.971 | 104.27                  | 107.06                | -267.85             | -44.44              | 1.10                   | 247         | 55.00  | 1.54184                       | 50         | 1.0        | 115                |

**Table S2.** Sample and crystal data for dan9339 (compound 4).

|                               |                                                                                                                                                                    |
|-------------------------------|--------------------------------------------------------------------------------------------------------------------------------------------------------------------|
| <b>Identification code</b>    | Dan9339                                                                                                                                                            |
| <b>Chemical formula</b>       | C <sub>20</sub> H <sub>24</sub> O <sub>7</sub>                                                                                                                     |
| <b>Formula weight</b>         | 376.39 g/mol                                                                                                                                                       |
| <b>Temperature</b>            | 115(2) K                                                                                                                                                           |
| <b>Wavelength</b>             | 1.54178 $\text{\AA}$                                                                                                                                               |
| <b>Crystal size</b>           | 0.089 × 0.129 × 0.245 mm                                                                                                                                           |
| <b>Crystal habit</b>          | colorless prism                                                                                                                                                    |
| <b>Crystal system</b>         | orthorhombic                                                                                                                                                       |
| <b>Space group</b>            | P 21 21 21                                                                                                                                                         |
| <b>Unit cell dimensions</b>   | a = 7.4900(2) $\text{\AA}$ $\alpha$ = 90 $^{\circ}$<br>b = 15.4129(3) $\text{\AA}$ $\beta$ = 90 $^{\circ}$<br>c = 16.6182(4) $\text{\AA}$ $\gamma$ = 90 $^{\circ}$ |
| <b>Volume</b>                 | 1918.45(8) $\text{\AA}^3$                                                                                                                                          |
| <b>Z</b>                      | 4                                                                                                                                                                  |
| <b>Density (calculated)</b>   | 1.303 g/cm <sup>3</sup>                                                                                                                                            |
| <b>Absorption coefficient</b> | 0.822 mm <sup>-1</sup>                                                                                                                                             |
| <b>F(000)</b>                 | 800                                                                                                                                                                |

**Table S3.** Data collection and structure refinement for dan9339 (compound 4).

|                                            |                                                                                                                                                                          |
|--------------------------------------------|--------------------------------------------------------------------------------------------------------------------------------------------------------------------------|
| <b>Theta range for data collection</b>     | 3.91 to 68.37 $^{\circ}$                                                                                                                                                 |
| <b>Index ranges</b>                        | -9 <= h <= 9, -18 <= k <= 18, -19 <= l <= 20                                                                                                                             |
| <b>Reflections collected</b>               | 18431                                                                                                                                                                    |
| <b>Independent reflections</b>             | 3487 [R(int) = 0.0405]                                                                                                                                                   |
| <b>Coverage of independent reflections</b> | 99.7%                                                                                                                                                                    |
| <b>Absorption correction</b>               | multi-scan                                                                                                                                                               |
| <b>Max. and min. transmission</b>          | 0.9300 and 0.8240                                                                                                                                                        |
| <b>Refinement method</b>                   | Full-matrix least-squares on F <sup>2</sup>                                                                                                                              |
| <b>Refinement program</b>                  | SHELXL-2014/7 (Sheldrick, 2014)                                                                                                                                          |
| <b>Function minimized</b>                  | $\sum w(F_o^2 - F_c^2)^2$                                                                                                                                                |
| <b>Data/restraints/parameters</b>          | 3487/0/249                                                                                                                                                               |
| <b>Goodness-of-fit on F<sup>2</sup></b>    | 1.036                                                                                                                                                                    |
| <b>Final R indices</b>                     | 3336 data; I > 2 $\sigma$ (I) R1 = 0.0291, wR2 = 0.0707<br>all data R1 = 0.0309, wR2 = 0.0719                                                                            |
| <b>Weighting scheme</b>                    | w = 1/[\sigma <sup>2</sup> (F <sub>o</sub> <sup>2</sup> ) + (0.0415P) <sup>2</sup> + 0.2595P]; where P = (F <sub>o</sub> <sup>2</sup> + 2F <sub>c</sub> <sup>2</sup> )/3 |
| <b>Absolute structure parameter</b>        | 0.09(6)                                                                                                                                                                  |
| <b>Largest diff. peak and hole</b>         | 0.137 and -0.166 e $\text{\AA}^{-3}$                                                                                                                                     |
| <b>R.M.S. deviation from mean</b>          | 0.040 e $\text{\AA}^{-3}$                                                                                                                                                |

**Table S4.** Atomic coordinates and equivalent isotropic atomic displacement parameters ( $\text{\AA}^2$ ) for dan9339 (compound 4).

|    | x/a       | y/b         | z/c         | U(eq)     |
|----|-----------|-------------|-------------|-----------|
| C1 | 0.5890(2) | 0.68732(11) | 0.58854(12) | 0.0181(4) |
| C2 | 0.4686(2) | 0.63540(12) | 0.53371(12) | 0.0174(4) |
| C3 | 0.5660(2) | 0.54937(12) | 0.51482(11) | 0.0180(4) |
| C4 | 0.4558(2) | 0.46653(12) | 0.51679(12) | 0.0192(4) |
| C5 | 0.3689(2) | 0.44603(12) | 0.58332(12) | 0.0204(4) |
| C6 | 0.3576(2) | 0.50168(12) | 0.65717(12) | 0.0184(4) |



|     |             |             |             |           |
|-----|-------------|-------------|-------------|-----------|
| C7  | 0.5003(2)   | 0.48677(12) | 0.72388(13) | 0.0182(4) |
| C8  | 0.5968(2)   | 0.56988(12) | 0.75250(12) | 0.0183(4) |
| C9  | 0.7543(2)   | 0.60451(12) | 0.70338(12) | 0.0184(4) |
| C10 | 0.7386(2)   | 0.62444(11) | 0.61354(12) | 0.0180(4) |
| C11 | 0.3903(2)   | 0.44921(12) | 0.79166(12) | 0.0209(4) |
| C12 | 0.1997(2)   | 0.45063(13) | 0.76815(12) | 0.0218(4) |
| C13 | 0.4409(3)   | 0.42247(15) | 0.86383(14) | 0.0315(5) |
| C14 | 0.9200(3)   | 0.65335(13) | 0.58126(13) | 0.0242(4) |
| C15 | 0.4643(3)   | 0.40725(13) | 0.44509(13) | 0.0279(5) |
| C1' | 0.4714(3)   | 0.69296(12) | 0.82249(13) | 0.0222(4) |
| C2' | 0.3076(3)   | 0.74727(12) | 0.82807(13) | 0.0233(4) |
| C3' | 0.2816(3)   | 0.79065(12) | 0.89667(15) | 0.0262(5) |
| C4' | 0.1220(3)   | 0.84333(14) | 0.91915(16) | 0.0339(5) |
| C5' | 0.1791(3)   | 0.74483(17) | 0.75874(16) | 0.0390(6) |
| O1  | 0.32615(17) | 0.65711(9)  | 0.50661(9)  | 0.0232(3) |
| O2  | 0.69368(16) | 0.54140(8)  | 0.57548(8)  | 0.0181(3) |
| O3  | 0.65374(17) | 0.56413(9)  | 0.44056(8)  | 0.0223(3) |
| O4  | 0.45614(16) | 0.63448(8)  | 0.76177(8)  | 0.0185(3) |
| O5  | 0.6010(2)   | 0.69724(11) | 0.86561(10) | 0.0347(4) |
| O6  | 0.06930(19) | 0.42746(10) | 0.80546(10) | 0.0300(4) |
| O7  | 0.18331(16) | 0.48419(9)  | 0.69406(9)  | 0.0221(3) |

U(eq) is defined as one third of the trace of the orthogonalized  $U_{ii}$  tensor.

Å) for dan9339 (compound 4).

|          |          |          |          |
|----------|----------|----------|----------|
| C1–C10   | 1.512(3) | C1–C10   | 1.538(2) |
| C1–H1A   | 0.99     | C1–H1B   | 0.99     |
| C2–O1    | 1.205(2) | C2–C3    | 1.546(3) |
| C3–O2    | 1.395(2) | C3–O3    | 1.416(2) |
| C3–C4    | 1.521(3) | C4–C5    | 1.321(3) |
| C4–C15   | 1.503(3) | C5–C6    | 1.500(3) |
| C5–H5    | 0.95     | C6–O7    | 1.467(2) |
| C6–C7    | 1.557(3) | C6–H6    | 1.0      |
| C7–C11   | 1.510(3) | C7–C8    | 1.546(2) |
| C7–H7    | 1.0      | C8–O4    | 1.458(2) |
| C8–C9    | 1.531(3) | C8–H8    | 1.0      |
| C9–C10   | 1.529(3) | C9–H9A   | 0.99     |
| C9–H9B   | 0.99     | C10–O2   | 1.467(2) |
| C10–C14  | 1.527(3) | C11–C13  | 1.324(3) |
| C11–C12  | 1.480(3) | C12–O6   | 1.211(2) |
| C12–O7   | 1.341(3) | C13–H13A | 0.95     |
| C13–H13B | 0.95     | C14–H14A | 0.98     |
| C14–H14B | 0.98     | C14–H14C | 0.98     |
| C15–H15A | 0.98     | C15–H15B | 0.98     |
| C15–H15C | 0.98     | C1'–O5   | 1.209(3) |
| C1'–O4   | 1.358(2) | C1'–C2'  | 1.488(3) |
| C2'–C3   | 1.336(3) | C2'–C5'  | 1.502(3) |
| C3'–C4'  | 1.493(3) | C3'–H3   | 0.95     |
| C4'–H4A  | 0.98     | C4'–H4B  | 0.98     |
| C4'–H4C  | 0.98     | C5'–H5A  | 0.98     |
| C5'–H5B  | 0.98     | C5'–H5C  | 0.98     |
| O3–H3A   | 0.84     |          |          |

**Table S6.** Bond angles (°) for dan9339 (compound 4).

|            |            |            |            |
|------------|------------|------------|------------|
| C2–C1–C10  | 105.31(14) | C2–C1–H1A  | 110.7      |
| C10–C1–H1A | 110.7      | C2–C1–H1B  | 110.7      |
| C10–C1–H1B | 110.7      | H1A–C1–H1B | 108.8      |
| O1–C2–C1   | 127.34(17) | O1–C2–C3   | 125.46(17) |
| C1–C2–C3   | 107.14(15) | O2–C3–O3   | 109.01(14) |
| O2–C3–C4   | 106.42(15) | O3–C3–C4   | 113.92(16) |

|               |            |               |            |
|---------------|------------|---------------|------------|
| O2-C3-C2      | 104.62(15) | O3-C3-C2      | 104.97(14) |
| C4-C3-C2      | 117.35(14) | C5-C4-C15     | 122.62(18) |
| C5-C4-C3      | 119.09(17) | C15-C4-C3     | 118.04(17) |
| C4-C5-C6      | 125.15(17) | C4-C5-H5      | 117.4      |
| C6-C5-H5      | 117.4      | O7-C6-C5      | 106.66(14) |
| O7-C6-C7      | 106.62(15) | C5-C6-C7      | 117.38(15) |
| O7-C6-H6      | 108.6      | C5-C6-H6      | 108.6      |
| C7-C6-H6      | 108.6      | C11-C7-C8     | 110.06(17) |
| C11-C7-C6     | 102.32(14) | C8-C7-C6      | 114.69(15) |
| C11-C7-H7     | 109.8      | C8-C7-H7      | 109.8      |
| C6-C7-H7      | 109.8      | O4-C8-C9      | 112.03(14) |
| O4-C8-C7      | 105.10(13) | C9-C8-C7      | 119.03(16) |
| O4-C8-H8      | 106.7      | C9-C8-H8      | 106.7      |
| C7-C8-H8      | 106.7      | C10-C9-C8     | 122.13(15) |
| C10-C9-H9A    | 106.8      | C8-C9-H9A     | 106.8      |
| C10-C9-H9B    | 106.8      | C8-C9-H9B     | 106.8      |
| H9A-C9-H9B    | 106.6      | O2-C10-C14    | 107.90(15) |
| O2-C10-C9     | 105.27(14) | C14-C10-C9    | 109.47(16) |
| O2-C10-C1     | 105.43(14) | C14-C10-C1    | 111.67(15) |
| C9-C10-C1     | 116.50(16) | C13-C11-C12   | 121.30(19) |
| C13-C11-C7    | 129.72(18) | C12-C11-C7    | 108.87(16) |
| O6-C12-O7     | 120.65(17) | O6-C12-C11    | 129.69(19) |
| O7-C12-C11    | 109.65(16) | C11-C13-H13A  | 120.0      |
| C11-C13-H13B  | 120.0      | H13A-C13-H13B | 120.0      |
| C10-C14-H14A  | 109.5      | C10-C14-H14B  | 109.5      |
| H14A-C14-H14B | 109.5      | C10-C14-H14C  | 109.5      |
| H14A-C14-H14C | 109.5      | H14B-C14-H14C | 109.5      |
| C4-C15-H15A   | 109.5      | C4-C15-H15B   | 109.5      |
| H15A-C15-H15B | 109.5      | C4-C15-H15C   | 109.5      |
| H15A-C15-H15C | 109.5      | H15B-C15-H15C | 109.5      |
| O5-C1'-O4     | 122.98(18) | O5-C1'-C2'    | 126.50(19) |
| O4-C1'-C2'    | 110.51(16) | C3'-C2'-C1'   | 117.05(19) |
| C3'-C2'-C5'   | 125.03(19) | C1'-C2'-C5'   | 117.81(18) |
| C2'-C3'-C4'   | 127.0(2)   | C2'-C3'-H3    | 116.5      |
| C4'-C3'-H3    | 116.5      | C3'-C4'-H4A   | 109.5      |
| C3'-C4'-H4B   | 109.5      | H4A-C4'-H4B   | 109.5      |
| C3'-C4'-H4C   | 109.5      | H4A-C4'-H4C   | 109.5      |
| H4B-C4'-H4C   | 109.5      | C2'-C5'-H5A   | 109.5      |
| C2'-C5'-H5B   | 109.5      | H5A-C5'-H5B   | 109.5      |
| C2'-C5'-H5C   | 109.5      | H5A-C5'-H5C   | 109.5      |
| H5B-C5'-H5C   | 109.5      | C3-O2-C10     | 113.08(13) |
| C3-O3-H3A     | 109.5      | C1'-O4-C8     | 118.11(15) |
| C12-O7-C6     | 111.89(14) |               |            |

Table S7. Torsion angles (°) for dan9339 (compound 4).

|               |             |               |             |
|---------------|-------------|---------------|-------------|
| C10-C1-C2-O1  | 172.44(19)  | C10-C1-C2-C3  | -10.20(19)  |
| O1-C2-C3-O2   | -163.27(18) | C1-C2-C3-O2   | 19.31(19)   |
| O1-C2-C3-O3   | 82.0(2)     | C1-C2-C3-O3   | -95.42(17)  |
| O1-C2-C3-C4   | -45.6(3)    | C1-C2-C3-C4   | 136.94(17)  |
| O2-C3-C4-C5   | 59.5(2)     | O3-C3-C4-C5   | 179.64(17)  |
| C2-C3-C4-C5   | -57.2(2)    | O2-C3-C4-C15  | -114.96(18) |
| O3-C3-C4-C15  | 5.2(2)      | C2-C3-C4-C15  | 128.38(19)  |
| C15-C4-C5-C6  | 179.06(18)  | C3-C4-C5-C6   | 4.9(3)      |
| C4-C5-C6-O7   | 148.34(18)  | C4-C5-C6-C7   | -92.2(2)    |
| O7-C6-C7-C11  | 7.55(18)    | C5-C6-C7-C11  | -111.89(17) |
| O7-C6-C7-C8   | -111.59(16) | C5-C6-C7-C8   | 128.97(18)  |
| C11-C7-C8-O4  | -70.66(18)  | C6-C7-C8-O4   | 44.1(2)     |
| C11-C7-C8-C9  | 162.89(15)  | C6-C7-C8-C9   | -82.4(2)    |
| O4-C8-C9-C10  | -68.4(2)    | C7-C8-C9-C10  | 54.7(2)     |
| C8-C9-C10-O2  | -61.4(2)    | C8-C9-C10-C14 | -177.14(16) |
| C8-C9-C10-C1  | 55.0(2)     | C2-C1-C10-O2  | -2.09(19)   |
| C2-C1-C10-C14 | 114.83(18)  | C2-C1-C10-C9  | -118.38(17) |
| C8-C7-C11-C13 | -58.8(3)    | C6-C7-C11-C13 | 178.8(2)    |
| C8-C7-C11-C12 | 117.40(17)  | C6-C7-C11-C12 | -4.9(2)     |

|                 |             |                 |             |
|-----------------|-------------|-----------------|-------------|
| C13-C11-C12-O6  | -2.5(4)     | C7-C11-C12-O6   | -179.1(2)   |
| C13-C11-C12-O7  | 176.98(19)  | C7-C11-C12-O7   | 0.4(2)      |
| O5-C1'-C2'-C3'  | -16.4(3)    | O4-C1'-C2'-C3'  | 162.35(17)  |
| O5-C1'-C2'-C5'  | 167.3(2)    | O4-C1'-C2'-C5'  | -13.9(3)    |
| C1'-C2'-C3'-C4' | -174.79(19) | C5'-C2'-C3'-C4' | 1.2(3)      |
| O3-C3-O2-C10    | 90.09(17)   | C4-C3-O2-C10    | -146.64(15) |
| C2-C3-O2-C10    | -21.76(19)  | C14-C10-O2-C3   | -103.87(17) |
| C9-C10-O2-C3    | 139.30(14)  | C1-C10-O2-C3    | 15.6(2)     |
| O5-C1'-O4-C8    | 4.9(3)      | C2'-C1'-O4-C8   | -173.95(15) |
| C9-C8-O4-C1'    | -84.6(2)    | C7-C8-O4-C1'    | 144.73(16)  |
| O6-C12-O7-C6    | -175.56(18) | C11-C12-O7-C6   | 4.9(2)      |
| C5-C6-O7-C12    | 118.10(16)  | C7-C6-O7-C12    | -8.1(2)     |

Anisotropic atomic displacement parameters ( $\text{\AA}^2$ ) for dan9339 (compound 4).

|     | $U_{11}$   | $U_{22}$   | $U_{33}$   | $U_{23}$    | $U_{13}$    | $U_{12}$   |
|-----|------------|------------|------------|-------------|-------------|------------|
| C1  | 0.0184(9)  | 0.0159(8)  | 0.0200(10) | 0.0016(7)   | -0.0019(7)  | -0.0014(7) |
| C2  | 0.0168(9)  | 0.0182(8)  | 0.0173(10) | 0.0042(7)   | 0.0017(8)   | -0.0028(7) |
| C3  | 0.0173(8)  | 0.0213(9)  | 0.0153(9)  | 0.0005(8)   | -0.0018(7)  | 0.0003(7)  |
| C4  | 0.0194(8)  | 0.0178(8)  | 0.0205(10) | -0.0016(7)  | -0.0041(8)  | -0.0005(7) |
| C5  | 0.0190(8)  | 0.0189(8)  | 0.0232(11) | 0.0004(8)   | -0.0033(8)  | -0.0040(7) |
| C6  | 0.0162(8)  | 0.0195(8)  | 0.0194(10) | 0.0028(8)   | 0.0021(7)   | -0.0023(7) |
| C7  | 0.0178(8)  | 0.0182(9)  | 0.0186(10) | 0.0020(7)   | -0.0006(8)  | -0.0003(7) |
| C8  | 0.0158(8)  | 0.0201(9)  | 0.0189(10) | 0.0011(7)   | -0.0021(7)  | 0.0010(7)  |
| C9  | 0.0134(7)  | 0.0218(9)  | 0.0199(11) | -0.0002(8)  | -0.0024(7)  | -0.0017(7) |
| C10 | 0.0161(8)  | 0.0172(8)  | 0.0208(10) | 0.0001(8)   | -0.0019(8)  | -0.0020(7) |
| C11 | 0.0211(9)  | 0.0190(9)  | 0.0227(11) | 0.0031(8)   | 0.0016(7)   | -0.0009(7) |
| C12 | 0.0211(9)  | 0.0225(9)  | 0.0217(11) | -0.0038(8)  | 0.0015(8)   | -0.0021(7) |
| C13 | 0.0243(9)  | 0.0414(12) | 0.0290(13) | 0.0141(10)  | -0.0010(9)  | -0.0031(9) |
| C14 | 0.0186(9)  | 0.0280(10) | 0.0262(11) | 0.0038(8)   | 0.0014(8)   | -0.0036(7) |
| C15 | 0.0405(11) | 0.0228(9)  | 0.0204(11) | -0.0041(8)  | -0.0014(10) | -0.0032(9) |
| C1' | 0.0229(9)  | 0.0213(9)  | 0.0224(11) | -0.0021(8)  | -0.0013(8)  | -0.0045(7) |
| C2' | 0.0226(9)  | 0.0191(8)  | 0.0282(12) | -0.0001(8)  | 0.0004(8)   | -0.0032(8) |
| C3' | 0.0276(10) | 0.0188(9)  | 0.0322(12) | -0.0010(9)  | 0.0018(9)   | -0.0041(7) |
| C4' | 0.0355(12) | 0.0234(10) | 0.0429(15) | -0.0080(10) | 0.0101(11)  | -0.0015(8) |
| C5' | 0.0320(11) | 0.0429(13) | 0.0419(15) | -0.0117(12) | -0.0122(11) | 0.0149(10) |
| O1  | 0.0184(6)  | 0.0233(7)  | 0.0278(8)  | 0.0034(6)   | -0.0044(6)  | 0.0008(5)  |
| O2  | 0.0176(6)  | 0.0177(6)  | 0.0189(7)  | -0.0008(5)  | -0.0035(5)  | 0.0006(5)  |
| O3  | 0.0191(6)  | 0.0317(7)  | 0.0162(7)  | 0.0002(6)   | 0.0011(5)   | -0.0024(6) |
| O4  | 0.0165(6)  | 0.0200(6)  | 0.0190(7)  | -0.0019(5)  | -0.0017(5)  | 0.0011(5)  |
| O5  | 0.0280(8)  | 0.0415(9)  | 0.0347(10) | -0.0154(7)  | -0.0111(7)  | 0.0048(6)  |
| O6  | 0.0235(7)  | 0.0434(8)  | 0.0231(8)  | -0.0025(7)  | 0.0052(6)   | -0.0096(6) |

Hydrogen atomic coordinates and isotropic atomic displacement parameters ( $\text{\AA}^2$ ) for dan9339 (compound 4).

|      | x/a    | y/b    | z/c    | U(eq) |
|------|--------|--------|--------|-------|
| H1A  | 0.5225 | 0.7080 | 0.6363 | 0.022 |
| H1B  | 0.6390 | 0.7381 | 0.5598 | 0.022 |
| H5   | 0.3088 | 0.3918 | 0.5845 | 0.024 |
| H6   | 0.3616 | 0.5640 | 0.6404 | 0.022 |
| H7   | 0.5899 | 0.4431 | 0.7052 | 0.022 |
| H8   | 0.6435 | 0.5574 | 0.8077 | 0.022 |
| H9A  | 0.7942 | 0.6586 | 0.7299 | 0.022 |
| H9B  | 0.8526 | 0.5621 | 0.7094 | 0.022 |
| H13A | 0.3541 | 0.4037 | 0.9017 | 0.038 |
| H13B | 0.5639 | 0.4221 | 0.8777 | 0.038 |
| H14A | 1.0093 | 0.6085 | 0.5926 | 0.036 |
| H14B | 0.9553 | 0.7077 | 0.6074 | 0.036 |
| H14C | 0.9119 | 0.6624 | 0.5230 | 0.036 |
| H15A | 0.3978 | 0.3539 | 0.4566 | 0.042 |
| H15B | 0.5892 | 0.3928 | 0.4336 | 0.042 |
| H15C | 0.4116 | 0.4363 | 0.3983 | 0.042 |
| H3   | 0.3748 | 0.7877 | 0.9353 | 0.031 |
| H4A  | 0.1543 | 0.9049 | 0.9202 | 0.051 |
| H4B  | 0.0797 | 0.8256 | 0.9725 | 0.051 |

|     |        |        |        |       |
|-----|--------|--------|--------|-------|
| H4C | 0.0270 | 0.8340 | 0.8795 | 0.051 |
| H5A | 0.1285 | 0.6864 | 0.7539 | 0.058 |
| H5B | 0.2420 | 0.7598 | 0.7090 | 0.058 |
| H5C | 0.0827 | 0.7867 | 0.7681 | 0.058 |
| H3A | 0.5778 | 0.5669 | 0.4035 | 0.033 |

**Table S10.** Hydrogen bond distances (Å) and angles (°) for dan9339 (compound 4).

|             | <b>Donor-H</b> | <b>Acceptor-H</b> | <b>Donor-Acceptor</b> | <b>Angle</b> |
|-------------|----------------|-------------------|-----------------------|--------------|
| C1-H1B...O1 | 0.99           | 2.41              | 3.377(2)              | 166.3        |
| O3-H3A...O6 | 0.84           | 1.97              | 2.801(2)              | 171.4        |
